# Supplementary material
Source: Research Square preprint supplement (doi:10.21203/rs.3.rs-9271169/v1)
Supplement: Supplementary file [file d1eaba6d1562ea3afc6ecb87.pdf]

## Supplementary information

### Halogen bond-driven azobenzene tautomerisation: a computational study

Antti Siiskonen and Arri Priimagi

*Smart Photonic Materials, Faculty of Engineering and Natural Sciences, Tampere  
University, Korkeakoulunkatu 3, FI-33720 Tampere, Finland*

[arri.priimagi@tuni.fi](mailto:arri.priimagi@tuni.fi)

## Halogen bonding in the derivatives of 1 – 4.

The acceptor sites for **1** are presented in **Fig. S1**. Same nomenclature is used for **2 – 4**. The propensity of OH/O, N1, and N2 to act as XB acceptors varies across the core structures. Whereas OH/O and N1 act as halogen bond acceptors in all compounds for both tautomers, N2 does so only in the derivatives of **1**, AT-**2** and **3**. The N2 atom is  $sp^3$ -hybridised in HTs but due to conjugation it is nevertheless planar. To act as an XB acceptor, it needs to lose planarity which weakens the internal hydrogen bond in **2** and **4** by increasing its length and consequently N2 is a poor acceptor site in HT-**2** and HT-**4**.

Hybridisation of the XB acceptor atom ( $sp^2$  or  $sp^3$ ) dictates the orientation of the halogen bond as the XB donor preferably approaches from the direction of the free electron pair on the acceptor. N1 is  $sp^2$ -hybridised in both tautomers, and the halogen-bonded complex would be expected to be planar. However, steric hindrance prevents in-plane approach. Same is observed for N2 in the ATs. Therefore, binding to N1 or N2 requires azobenzene or azonaphthalene to adopt a non-planar geometry to allow better access to the acceptor site. That increases the energy of the complexes and diminishes the energy-lowering effect of XB when the acceptor site is N1 or N2. Binding to OH/O does not require similar changes in geometry. Therefore, although iodine may interact more strongly with N1 or N2 than with OH/O, the lowest-energy complex may nevertheless have XB to OH/O.

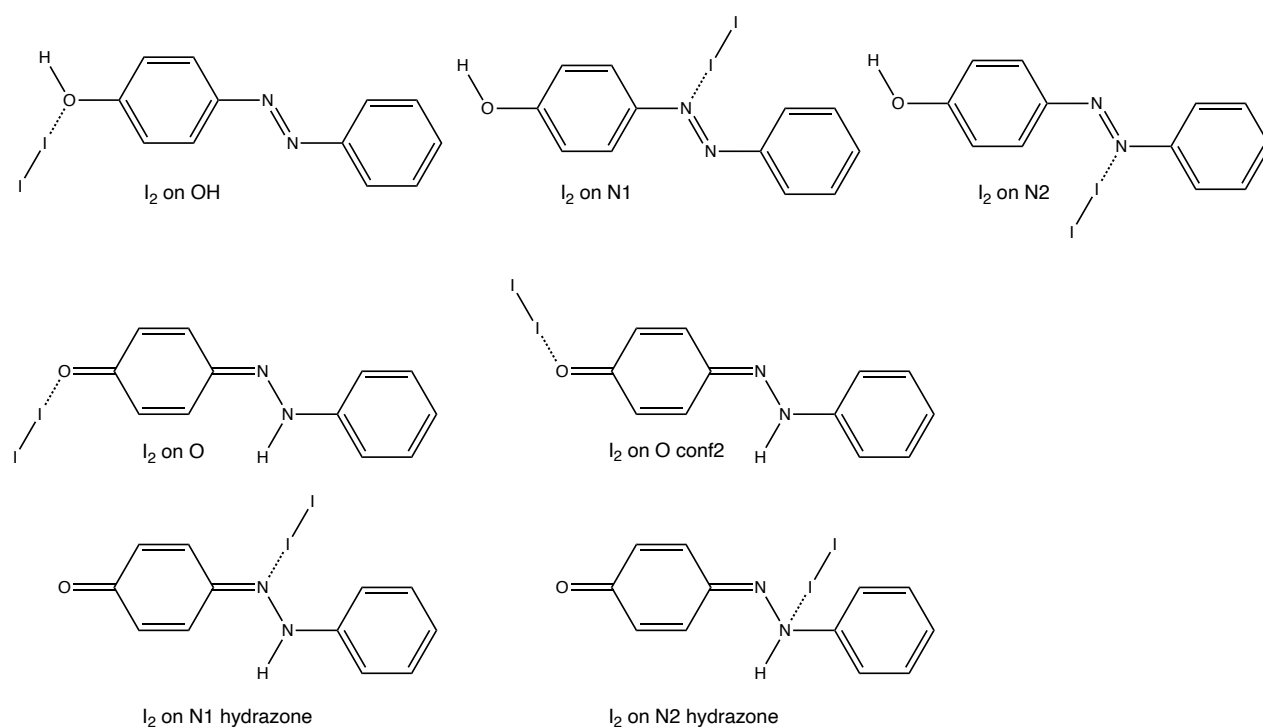

**Fig. S1** The XB acceptor sites in AT-**1** and HT-**1**.

**Table S1** The  $\Delta G_{\text{XB-AT}}$  and  $\Delta G_{\text{XB-HT}}$  values for the derivatives of **1**. The column label (e.g. on OH) denotes the site of halogen bonding. All values are in kcal/mol.

| Compound               | $\Delta G_{\text{XB-AT}}$ |       |       | $\Delta G_{\text{XB-HT}}$ |            |       |       |
|------------------------|---------------------------|-------|-------|---------------------------|------------|-------|-------|
|                        | on OH                     | on N1 | on N2 | on O                      | on O conf2 | on N1 | on N2 |
| <b>1</b>               | 0                         | 0.12  | 0.17  | 7.29                      | 7.33       | 9.64  | 10.00 |
| 2-MeO- <b>1</b>        | 1.06                      | 0     | 0.98  | 0.54                      | 1.12       | 3.73  | 3.78  |
| 3-MeO- <b>1</b>        | 0.15                      | 0.49  | 0     | 9.85                      | 8.45       | 11.63 | 11.96 |
| 2'-MeO- <b>1</b>       | 0.90                      | 0.83  | 0     | 4.36                      | 4.55       | 6.83  | 6.84  |
| 3'-MeO- <b>1</b>       | 0.47                      | 0     | 0.53  | 7.29                      | 7.09       | 9.54  | 10.11 |
| 4'-MeO- <b>1</b>       | 0.05                      | 0.11  | 0     | 8.68                      | 8.52       | 11.19 | 11.69 |
| 2-MeO-2'-MeO- <b>1</b> | 4.04                      | 3.24  | 2.64  | 0                         | 0.29       | 3.33  | 2.33  |

**Table S2** XB strengths for the complexes of iodine and the derivatives of **1**. The column label (e.g. on OH) denotes the site of halogen bonding. The value for the complex with the lowest  $\Delta G$  value for the given tautomer is shown in bold. All values are in kcal/mol.

| Compound               | $E_{\text{XB-AT}}$ |              |              | $E_{\text{XB-HT}}$ |              |       |       |
|------------------------|--------------------|--------------|--------------|--------------------|--------------|-------|-------|
|                        | on OH              | on N1        | on N2        | on O               | on O conf2   | on N1 | on N2 |
| <b>1</b>               | <b>-4.33</b>       | -6.57        | -6.36        | <b>-7.28</b>       | -7.21        | -4.73 | -4.45 |
| 2-MeO- <b>1</b>        | -4.33              | <b>-8.21</b> | -7.23        | <b>-8.56</b>       | -7.93        | -4.63 | -4.66 |
| 3-MeO- <b>1</b>        | -4.68              | -7.03        | <b>-7.09</b> | -6.89              | <b>-7.96</b> | -5.70 | -5.96 |
| 2'-MeO- <b>1</b>       | -4.47              | -7.27        | <b>-8.10</b> | <b>-7.60</b>       | -7.51        | -4.89 | -5.23 |
| 3'-MeO- <b>1</b>       | -4.32              | <b>-6.98</b> | -6.30        | -7.27              | <b>-7.24</b> | -5.10 | -4.44 |
| 4'-MeO- <b>1</b>       | -4.45              | -6.61        | <b>-6.64</b> | -7.61              | <b>-7.52</b> | -4.96 | -4.68 |
| 2-MeO-2'-MeO- <b>1</b> | -4.74              | <b>-8.92</b> | -8.98        | <b>-8.90</b>       | -8.25        | -4.75 | -5.76 |

**Table S3.** The  $\Delta G_{\text{XB-AT}}$  and  $\Delta G_{\text{XB-HT}}$  values for the derivatives of **2**. The column label (e.g. on OH) denotes the site of halogen bonding. All values are in kcal/mol.

| Compound              | $\Delta G_{\text{XB-AT}}$ |       |       | $\Delta G_{\text{XB-HT}}$ |       |
|-----------------------|---------------------------|-------|-------|---------------------------|-------|
|                       | on OH                     | on N1 | on N2 | on O                      | on N1 |
| <b>2</b>              | 0                         | 1.36  | 1.57  | 4.21                      | 7.37  |
| 3-MeO- <b>2</b>       | 0                         | 2.97  | 3.20  | 3.85                      | 7.49  |
| 4-MeO- <b>2</b>       | 0                         | 1.36  | 1.53  | 1.16                      | 4.51  |
| 5-MeO- <b>2</b>       | 0                         | 0.76  | 1.37  | 2.75                      | 5.38  |
| 6-MeO- <b>2</b>       | 0.88                      | 0     | 2.30  | 2.98                      | 4.71  |
| 2'-MeO- <b>2</b>      | 0                         | 1.87  | 1.54  | 3.07                      | 7.22  |
| 3'-MeO- <b>2</b>      | 0                         | 0.93  | 1.30  | 4.04                      | 6.81  |
| 4'-MeO- <b>2</b>      | 0                         | 1.26  | 1.39  | 4.81                      | 8.16  |
| 4-MeO-6-MeO- <b>2</b> | 0.59                      | 0     | 2.10  | 0.12                      | 2.17  |

**Table S4.** XB strengths for the complexes of iodine and the derivatives of **2**. The column label (e.g. on OH) denotes the site of halogen bonding. The value for the complex with the lowest  $\Delta G$  value for the given tautomer is shown in bold. All values are in kcal/mol.

| Compound              | $E_{XB-AT}$  |              |       | $E_{XB-HT}$  |       |
|-----------------------|--------------|--------------|-------|--------------|-------|
|                       | on OH        | on N1        | on N2 | on O         | on N1 |
| <b>2</b>              | <b>-5.09</b> | -5.50        | -3.60 | <b>-7.67</b> | -4.51 |
| 3-MeO- <b>2</b>       | <b>-7.04</b> | -5.59        | -3.64 | <b>-8.59</b> | -4.66 |
| 4-MeO- <b>2</b>       | <b>-5.34</b> | -5.72        | -3.95 | <b>-8.40</b> | -4.69 |
| 5-MeO- <b>2</b>       | <b>-5.44</b> | -5.40        | -3.74 | <b>-7.82</b> | -4.68 |
| 6-MeO- <b>2</b>       | -5.22        | <b>-7.12</b> | -3.88 | <b>-7.95</b> | -6.46 |
| 2'-MeO- <b>2</b>      | <b>-6.09</b> | -5.85        | -5.60 | <b>-8.84</b> | -4.68 |
| 3'-MeO- <b>2</b>      | <b>-5.07</b> | -5.88        | -3.65 | <b>-7.66</b> | -4.94 |
| 4'-MeO- <b>2</b>      | <b>-5.30</b> | -5.55        | -3.79 | <b>-8.17</b> | -4.67 |
| 4-MeO-6-MeO- <b>2</b> | <b>-5.50</b> | -7.27        | -4.22 | <b>-8.69</b> | -6.47 |

**Table S5.** The  $\Delta G_{XB-AT}$  and  $\Delta G_{XB-HT}$  values for the derivatives of **3**. The column label (e.g. on OH) denotes the site of halogen bonding. All values are in kcal/mol.

| Compound         | $\Delta G_{XB-AT}$ |       |       | $\Delta G_{XB-HT}$ |            |       |       |
|------------------|--------------------|-------|-------|--------------------|------------|-------|-------|
|                  | on OH              | on N1 | on N2 | on O               | on O conf2 | on N1 | on N2 |
| <b>3</b>         | 1.27               | 1.43  | 0.72  | 0                  | 0.68       | 1.73  | 2.67  |
| 2-MeO- <b>3</b>  | 12.57              | 11.85 | 10.05 | 0                  | 0.69       | 2.60  | 2.91  |
| 3-MeO- <b>3</b>  | 1.25               | 1.82  | 0.81  | 0                  | 1.13       | 3.12  | 3.07  |
| 5-MeO- <b>3</b>  | 0                  | 1.13  | 0.74  | 6.44               | 5.95       | 8.89  | 9.48  |
| 6-MeO- <b>3</b>  | 5.62               | 6.46  | 5.60  | 0                  | 5.26       | 6.92  | 7.74  |
| 7-MeO- <b>3</b>  | 1.18               | 0.79  | 0.35  | 0                  | 0.37       | 1.56  | 2.60  |
| 8-MeO- <b>3</b>  | 3.33               | 1.02  | 1.04  | 1.02               | 0          | 1.65  | 3.86  |
| 2'-MeO- <b>3</b> | 5.11               | 4.84  | 3.08  | 0                  | 2.58       | 1.53  | 1.88  |
| 3'-MeO- <b>3</b> | 1.33               | 1.17  | 0.76  | 0                  | 0.46       | 1.50  | 2.61  |
| 4'-MeO- <b>3</b> | 0.32               | 0.73  | 0     | 1.29               | 1.60       | 2.82  | 3.81  |

**Table S6.** XB strengths for the complexes of iodine and the derivatives of **3**. The column label (e.g. on OH) denotes the site of halogen bonding. The value for the complex with the lowest  $\Delta G$  value for the given tautomer is shown in bold. All values are in kcal/mol.

| Compound         | $E_{XB-AT}$  |              |              | $E_{XB-HT}$  |              |       |       |
|------------------|--------------|--------------|--------------|--------------|--------------|-------|-------|
|                  | on OH        | on N1        | on N2        | on O         | on O conf2   | on N1 | on N2 |
| <b>3</b>         | -4.29        | -6.19        | <b>-6.92</b> | <b>-6.86</b> | -6.02        | -5.12 | -5.31 |
| 2-MeO- <b>3</b>  | -4.30        | -7.42        | <b>-9.97</b> | <b>-8.16</b> | -6.62        | -4.97 | -5.47 |
| 3-MeO- <b>3</b>  | -4.65        | -5.95        | <b>-7.40</b> | <b>-7.61</b> | -5.76        | -6.11 | -6.88 |
| 5-MeO- <b>3</b>  | <b>-5.02</b> | -6.32        | -6.84        | -7.38        | <b>-8.38</b> | -5.55 | -5.61 |
| 6-MeO- <b>3</b>  | -4.90        | -6.20        | <b>-6.97</b> | <b>-6.91</b> | -6.91        | -5.23 | -5.56 |
| 7-MeO- <b>3</b>  | -4.31        | -6.77        | <b>-6.93</b> | <b>-7.11</b> | -6.23        | -5.72 | -5.36 |
| 8-MeO- <b>3</b>  | -4.39        | <b>-9.31</b> | -8.48        | -7.06        | <b>-6.12</b> | -8.16 | -5.64 |
| 2'-MeO- <b>3</b> | -4.41        | -6.83        | <b>-8.64</b> | <b>-7.10</b> | -6.21        | -5.26 | -6.08 |
| 3'-MeO- <b>3</b> | -4.28        | -6.61        | <b>-6.88</b> | <b>-6.83</b> | -6.01        | -5.35 | -5.36 |
| 4'-MeO- <b>3</b> | -4.39        | -6.28        | <b>-7.22</b> | <b>-7.10</b> | -6.19        | -5.32 | -5.67 |

**Table S7.** The  $\Delta G_{\text{XB-AT}}$  and  $\Delta G_{\text{XB-HT}}$  values for the derivatives of **4**. The column label (e.g. on OH) denotes the site of halogen bonding. All values are in kcal/mol.

| Compound         | $\Delta G_{\text{XB-AT}}$ |       | $\Delta G_{\text{XB-HT}}$ |       |
|------------------|---------------------------|-------|---------------------------|-------|
|                  | on OH                     | on N1 | on O                      | on N1 |
| <b>4</b>         | 1.81                      | 2.87  | 0                         | 2.39  |
| 3-MeO- <b>4</b>  | 1.75                      | 4.44  | 0                         | 2.87  |
| 4-MeO- <b>4</b>  | 3.82                      | 4.92  | 0                         | 2.86  |
| 5-MeO- <b>4</b>  | 1.23                      | 2.54  | 0                         | 2.24  |
| 6-MeO- <b>4</b>  | 1.04                      | 2.30  | 0                         | 2.13  |
| 7-MeO- <b>4</b>  | 1.21                      | 2.23  | 0                         | 2.32  |
| 8-MeO- <b>4</b>  | 2.77                      | 2.80  | 0                         | 1.41  |
| 2'-MeO- <b>4</b> | 1.71                      | 3.92  | 0                         | 2.89  |
| 3'-MeO- <b>4</b> | 1.11                      | 2.31  | 0                         | 1.86  |
| 4'-MeO- <b>4</b> | 0.49                      | 1.52  | 0                         | 2.36  |

**Table S8.** XB strengths for the complexes of iodine and the derivatives of **4**. The column label (e.g. on OH) denotes the site of halogen bonding. The value for the complex with the lowest  $\Delta G$  value for the given tautomer is shown in bold. All values are in kcal/mol.

| Name             | $E_{\text{XB-AT}}$ |       | $E_{\text{XB-HT}}$ |       |
|------------------|--------------------|-------|--------------------|-------|
|                  | on OH              | on N1 | on O               | on N1 |
| <b>4</b>         | <b>-4.86</b>       | -5.12 | <b>-6.95</b>       | -4.69 |
| 3-MeO- <b>4</b>  | <b>-6.79</b>       | -5.13 | <b>-8.04</b>       | -4.71 |
| 4-MeO- <b>4</b>  | <b>-5.28</b>       | -5.33 | <b>-7.85</b>       | -4.87 |
| 5-MeO- <b>4</b>  | <b>-4.95</b>       | -5.23 | <b>-7.20</b>       | -4.78 |
| 6-MeO- <b>4</b>  | <b>-5.03</b>       | -5.14 | <b>-7.06</b>       | -4.79 |
| 7-MeO- <b>4</b>  | <b>-4.96</b>       | -5.75 | <b>-7.13</b>       | -5.22 |
| 8-MeO- <b>4</b>  | <b>-5.05</b>       | -8.15 | <b>-7.15</b>       | -7.33 |
| 2'-MeO- <b>4</b> | <b>-5.90</b>       | -5.53 | <b>-7.92</b>       | -4.88 |
| 3'-MeO- <b>4</b> | <b>-4.85</b>       | -5.47 | <b>-6.92</b>       | -5.06 |
| 4'-MeO- <b>4</b> | <b>-5.08</b>       | -5.25 | <b>-7.33</b>       | -4.80 |

**Table S9.** IQA interatomic energies ( $E_{\text{IQA}}$ ), and the coulombic ( $E_{\text{cl}}$ ) and exchange-correlation ( $E_{\text{xc}}$ ) contributions of the iodine-oxygen interaction in AT-**4** and HT-**4** derivatives. All values are in Hartrees.

| Name             | azo tautomer<br>iodine-oxygen interaction |                 |                 | hydrazone tautomer<br>iodine-oxygen interaction |                 |                 |
|------------------|-------------------------------------------|-----------------|-----------------|-------------------------------------------------|-----------------|-----------------|
|                  | $E_{\text{IQA}}$                          | $E_{\text{cl}}$ | $E_{\text{xc}}$ | $E_{\text{IQA}}$                                | $E_{\text{cl}}$ | $E_{\text{xc}}$ |
|                  | <b>4</b>                                  | -0.0642         | -0.0398         | -0.0244                                         | -0.0860         | -0.0530         |
| 3-MeO- <b>4</b>  | -0.1035                                   | -0.0719         | -0.0316         | -0.1202                                         | -0.0828         | -0.0374         |
| 4-MeO- <b>4</b>  | -0.0654                                   | -0.0409         | -0.0246         | -0.0938                                         | -0.0581         | -0.0357         |
| 5-MeO- <b>4</b>  | -0.0654                                   | -0.0408         | -0.0246         | -0.0887                                         | -0.0549         | -0.0338         |
| 6-MeO- <b>4</b>  | -0.0660                                   | -0.0410         | -0.0250         | -0.0871                                         | -0.0537         | -0.0333         |
| 7-MeO- <b>4</b>  | -0.0652                                   | -0.0405         | -0.0246         | -0.0880                                         | -0.0544         | -0.0336         |
| 8-MeO- <b>4</b>  | -0.0686                                   | -0.0401         | -0.0286         | -0.0881                                         | -0.0544         | -0.0337         |
| 2'-MeO- <b>4</b> | -0.0726                                   | -0.0459         | -0.0267         | -0.0933                                         | -0.0581         | -0.0352         |
| 3'-MeO- <b>4</b> | -0.0642                                   | -0.0398         | -0.0244         | -0.0858                                         | -0.0529         | -0.0329         |

4'-MeO-4 | -0.0665 -0.0413 -0.0252 | -0.0900 -0.0556 -0.0344

**Table S10.** IQA interatomic energies ( $E_{\text{IQA}}$ ), and the coulombic ( $E_{\text{Cl}}$ ) and exchange-correlation ( $E_{\text{XC}}$ ) contributions of the iodine-oxygen interaction in the dimers of the AT-5 and HT-5 derivatives. All values are in Hartrees.

| Name                        | azo tautomer<br>iodine-oxygen interaction |                 |                 | hydrazone tautomer<br>iodine-oxygen interaction |                 |                 |
|-----------------------------|-------------------------------------------|-----------------|-----------------|-------------------------------------------------|-----------------|-----------------|
|                             | $E_{\text{IQA}}$                          | $E_{\text{Cl}}$ | $E_{\text{XC}}$ | $E_{\text{IQA}}$                                | $E_{\text{Cl}}$ | $E_{\text{XC}}$ |
| <b>5</b>                    | -0.0577                                   | -0.0402         | -0.0174         | -0.0693                                         | -0.0483         | -0.0211         |
| 3-MeO-5                     | -0.1024                                   | -0.0776         | -0.0248         | -0.1121                                         | -0.0826         | -0.0295         |
| 3-NO <sub>2</sub> -5        | -0.0746                                   | -0.0484         | -0.0263         | -0.0881                                         | -0.0585         | -0.0296         |
| 4-MeO-5                     | -0.0551                                   | -0.0379         | -0.0173         | -0.0703                                         | -0.0486         | -0.0217         |
| 4-NO <sub>2</sub> -5        | -0.0577                                   | -0.0404         | -0.0172         | -0.0683                                         | -0.0477         | -0.0205         |
| 5-MeO-5                     | -0.0576                                   | -0.0401         | -0.0175         | -0.0707                                         | -0.0493         | -0.0214         |
| 5-NO <sub>2</sub> -5        | -0.0568                                   | -0.0396         | -0.0172         | -0.0698                                         | -0.0489         | -0.0209         |
| 6-MeO-5                     | -0.0581                                   | -0.0404         | -0.0177         | -0.0687                                         | -0.0477         | -0.0210         |
| 6-NO <sub>2</sub> -5        | -0.0557                                   | -0.0387         | -0.0170         | -0.0696                                         | -0.0487         | -0.0209         |
| 7-MeO-5                     | -0.0579                                   | -0.0404         | -0.0175         | -0.0709                                         | -0.0496         | -0.0214         |
| 7-NO <sub>2</sub> -5        | -0.0555                                   | -0.0385         | -0.0170         | -0.0681                                         | -0.0474         | -0.0207         |
| 8-MeO-5                     | -0.0563                                   | -0.0390         | -0.0173         | -0.0679                                         | -0.0470         | -0.0209         |
| 8-NO <sub>2</sub> -5        | -0.0533                                   | -0.0366         | -0.0167         | -0.0672                                         | -0.0466         | -0.0205         |
| 3'-MeO-5                    | -0.0628                                   | -0.0400         | -0.0228         | -0.0728                                         | -0.0499         | -0.0229         |
| 3'-NO <sub>2</sub> -5       | -0.0755                                   | -0.0501         | -0.0254         | -0.0880                                         | -0.0581         | -0.0300         |
| 4'-MeO-5                    | -0.0603                                   | -0.0387         | -0.0216         | -0.0725                                         | -0.0474         | -0.0251         |
| 4'-NO <sub>2</sub> -5       | -0.0634                                   | -0.0423         | -0.0211         | -0.0735                                         | -0.0494         | -0.0241         |
| 5'-MeO-5                    | -0.0567                                   | -0.0363         | -0.0204         | -0.0668                                         | -0.0435         | -0.0233         |
| 5'-NO <sub>2</sub> -5       | -0.0648                                   | -0.0434         | -0.0214         | -0.0757                                         | -0.0511         | -0.0246         |
| 6'-MeO-5                    | -0.0590                                   | -0.0364         | -0.0227         | -0.0730                                         | -0.0480         | -0.0250         |
| 4-MeO-4'-NO <sub>2</sub> -5 | -0.0617                                   | -0.0441         | -0.0176         | -0.0776                                         | -0.0552         | -0.0224         |
| 4-NO <sub>2</sub> -4'-MeO-5 | -0.0604                                   | -0.0427         | -0.0178         | -0.0728                                         | -0.0512         | -0.0215         |

**Table S11.** IQA interatomic energies ( $E_{\text{IQA}}$ ), and the coulombic ( $E_{\text{Cl}}$ ) and exchange-correlation ( $E_{\text{XC}}$ ) contributions of the iodine-iodine interaction interaction in the dimers of the AT-5 and HT-5 derivatives. All values are in Hartrees.

| Name                 | azo tautomer<br>iodine-iodine interaction |                 |                 | hydrazone tautomer<br>iodine-iodine interaction |                 |                 |
|----------------------|-------------------------------------------|-----------------|-----------------|-------------------------------------------------|-----------------|-----------------|
|                      | $E_{\text{IQA}}$                          | $E_{\text{Cl}}$ | $E_{\text{XC}}$ | $E_{\text{IQA}}$                                | $E_{\text{Cl}}$ | $E_{\text{XC}}$ |
| <b>5</b>             | -0.0007                                   | 0.0026          | -0.0033         | 0.0006                                          | 0.0033          | -0.0027         |
| 3-MeO-5              | 0.0017                                    | 0.0029          | -0.0012         | 0.0014                                          | 0.0035          | -0.0021         |
| 3-NO <sub>2</sub> -5 | -0.0016                                   | 0.0031          | -0.0047         | -0.0002                                         | 0.0039          | -0.0041         |
| 4-MeO-5              | -0.0006                                   | 0.0023          | -0.0029         | 0.0006                                          | 0.0033          | -0.0026         |
| 4-NO <sub>2</sub> -5 | -0.0003                                   | 0.0027          | -0.0029         | 0.0007                                          | 0.0034          | -0.0027         |
| 5-MeO-5              | 0.0006                                    | 0.0026          | -0.0020         | 0.0007                                          | 0.0035          | -0.0027         |
| 5-NO <sub>2</sub> -5 | -0.0008                                   | 0.0026          | -0.0035         | 0.0006                                          | 0.0035          | -0.0028         |
| 6-MeO-5              | -0.0007                                   | 0.0027          | -0.0033         | 0.0005                                          | 0.0033          | -0.0028         |
| 6-NO <sub>2</sub> -5 | -0.0010                                   | 0.0025          | -0.0035         | 0.0005                                          | 0.0035          | -0.0030         |
| 7-MeO-5              | -0.0007                                   | 0.0027          | -0.0034         | 0.0007                                          | 0.0035          | -0.0028         |

|                             |         |        |         |        |        |         |
|-----------------------------|---------|--------|---------|--------|--------|---------|
| 7-NO <sub>2</sub> -5        | -0.0008 | 0.0024 | -0.0032 | 0.0006 | 0.0033 | -0.0027 |
| 8-MeO-5                     | -0.0012 | 0.0025 | -0.0037 | 0.0004 | 0.0032 | -0.0028 |
| 8-NO <sub>2</sub> -5        | -0.0018 | 0.0023 | -0.0041 | 0.0005 | 0.0031 | -0.0027 |
| 3'-MeO-5                    | 0.0010  | 0.0033 | -0.0023 | 0.0020 | 0.0041 | -0.0021 |
| 3'-NO <sub>2</sub> -5       | 0.0033  | 0.0056 | -0.0023 | 0.0043 | 0.0066 | -0.0024 |
| 4'-MeO-5                    | -0.0008 | 0.0029 | -0.0037 | 0.0006 | 0.0037 | -0.0031 |
| 4'-NO <sub>2</sub> -5       | 0.0004  | 0.0036 | -0.0033 | 0.0017 | 0.0043 | -0.0026 |
| 5'-MeO-5                    | -0.0006 | 0.0025 | -0.0031 | 0.0006 | 0.0032 | -0.0026 |
| 5'-NO <sub>2</sub> -5       | 0.0005  | 0.0038 | -0.0033 | 0.0020 | 0.0046 | -0.0026 |
| 6'-MeO-5                    | -0.0033 | 0.0029 | -0.0062 | 0.0007 | 0.0035 | -0.0028 |
| 6'-NO <sub>2</sub> -5       | -0.0020 | 0.0038 | -0.0057 | 0.0018 | 0.0045 | -0.0027 |
| 4-MeO-4'-NO <sub>2</sub> -5 | 0.0009  | 0.0033 | -0.0024 | 0.0019 | 0.0044 | -0.0025 |
| 4-NO <sub>2</sub> -4-MeO-5  | 0.0001  | 0.0030 | -0.0028 | 0.0010 | 0.0038 | -0.0028 |

**Table S12.** The halogen bond lengths (top), angles (middle) and dihedral angles (bottom) in the complexes of iodine with the derivatives of **1**. The column label (e.g. on OH) denotes the site of halogen bonding on the acceptor. The lengths are in Ångströms and the angles are in degrees.

| Name           | azo tautomer |        |        | hydrazone tautomer |            |        |        |
|----------------|--------------|--------|--------|--------------------|------------|--------|--------|
|                | on OH        | on N1  | on N2  | on O               | on O conf2 | on N1  | on N2  |
| <b>1</b>       | 3.003        | 3.045  | 3.035  | 2.826              | 2.826      | 3.147  | 3.113  |
|                | 178.53       | 174.17 | 174.34 | 179.02             | 179.67     | 174.13 | 172.71 |
|                | 47.99        | 43.54  | 50.03  | 0.01               | 0.03       | 55.00  | 82.06  |
| 2-MeO-1        | 3.006        | 3.072  | 2.989  | 2.773              | 2.792      | 3.165  | 3.183  |
|                | 178.25       | 168.74 | 174.92 | 178.88             | 179.93     | 174.80 | 175.20 |
|                | 48.90        | 51.83  | 46.98  | 0.03               | 0.04       | 58.95  | 79.59  |
| 3-MeO-1        | 2.986        | 3.052  | 3.036  | 2.846              | 2.846      | 3.111  | 3.044  |
|                | 178.12       | 174.10 | 175.97 | 178.67             | 179.31     | 174.17 | 174.55 |
|                | 49.50        | 44.12  | 50.98  | 0.01               | 0.02       | 50.06  | 82.60  |
| 2'-MeO-1       | 2.994        | 3.002  | 3.063  | 2.810              | 2.811      | 3.139  | 3.119  |
|                | 178.76       | 174.48 | 168.20 | 179.43             | 179.73     | 174.68 | 175.35 |
|                | 46.80        | 41.32  | 54.47  | 0.00               | 0.00       | 56.03  | 71.97  |
| 3'-MeO-1       | 3.005        | 3.056  | 3.045  | 2.825              | 2.825      | 3.167  | 3.123  |
|                | 178.27       | 174.62 | 174.41 | 179.24             | 179.61     | 175.10 | 172.33 |
|                | 50.04        | 45.05  | 49.23  | 0.00               | 0.02       | 53.12  | 85.32  |
| 4'-MeO-1       | 2.997        | 3.030  | 3.031  | 2.809              | 2.810      | 3.130  | 3.091  |
|                | 178.47       | 174.38 | 174.48 | 179.38             | 179.92     | 174.31 | 173.30 |
|                | 49.52        | 47.54  | 46.90  | 0.01               | 0.02       | 52.81  | 81.59  |
| 2-MeO-4'-MeO-1 | 2.997        | 3.060  | 2.983  | 2.758              | 2.778      | 3.150  | 3.167  |
|                | 178.19       | 168.68 | 175.07 | 179.06             | 179.74     | 174.80 | 175.61 |
|                | 49.08        | 53.46  | 43.20  | 0.07               | 0.08       | 57.41  | 78.80  |

**Table S13.** The halogen bond lengths (top), angles (middle) and dihedral angles (bottom) in the complexes of iodine with the derivatives of **2**. The column label (e.g. on OH) denotes the site of halogen bonding on the acceptor. The lengths are in Ångströms and the angles are in degrees.

| Name                   | azo tautomer |        |        | hydrazone tautomer |        |
|------------------------|--------------|--------|--------|--------------------|--------|
|                        | on OH        | on N1  | on N2  | on O               | on N1  |
| <b>2</b>               | 2.957        | 3.111  | 3.249  | 2.801              | 3.162  |
|                        | 179.08       | 172.57 | 176.55 | 177.98             | 175.14 |
| 3-MeO- <b>2</b>        | 41.73        | 45.44  | 69.69  | 0.02               | 53.19  |
|                        | 3.094        | 3.107  | 3.248  | 2.895              | 3.152  |
| 4-MeO- <b>2</b>        | 162.50       | 173.72 | 177.53 | 169.24             | 174.77 |
|                        | 0.05         | 45.82  | 69.29  | 0.07               | 54.12  |
| 5-MeO- <b>2</b>        | 2.958        | 3.098  | 3.226  | 2.774              | 3.152  |
|                        | 178.91       | 173.60 | 176.97 | 178.80             | 175.23 |
| 6-MeO- <b>2</b>        | 39.17        | 45.12  | 70.62  | 0.01               | 53.59  |
|                        | 2.946        | 3.108  | 3.241  | 2.816              | 3.139  |
| 2'-MeO- <b>2</b>       | 179.18       | 174.17 | 177.38 | 178.31             | 175.65 |
|                        | 45.36        | 43.14  | 68.54  | 0.01               | 51.66  |
| 3'-MeO- <b>2</b>       | 2.952        | 3.271  | 3.228  | 2.788              | 3.389  |
|                        | 179.20       | 155.66 | 177.08 | 177.95             | 148.45 |
| 4'-MeO- <b>2</b>       | 39.11        | 46.03  | 71.26  | 0.00               | 47.05  |
|                        | 2.910        | 3.073  | 3.499  | 2.756              | 3.153  |
| 2-MeO-4'-MeO- <b>2</b> | 178.71       | 174.37 | 144.82 | 177.45             | 175.66 |
|                        | 36.74        | 48.05  | 52.37  | 0.02               | 54.63  |
| 3-MeO- <b>2</b>        | 2.959        | 3.131  | 3.251  | 2.801              | 3.181  |
|                        | 178.88       | 174.50 | 174.71 | 178.22             | 176.48 |
| 4-MeO- <b>2</b>        | 43.10        | 45.66  | 71.36  | 0.01               | 51.58  |
|                        | 2.944        | 3.098  | 3.238  | 2.779              | 3.146  |
| 2-MeO-4'-MeO- <b>2</b> | 179.07       | 174.19 | 177.60 | 177.86             | 175.13 |
|                        | 42.62        | 48.77  | 69.80  | 0.06               | 52.59  |
| 2-MeO-4'-MeO- <b>2</b> | 2.997        | 3.060  | 2.983  | 2.758              | 3.150  |
|                        | 178.19       | 168.68 | 175.07 | 179.06             | 174.80 |
| 2-MeO-4'-MeO- <b>2</b> | 49.08        | 53.46  | 43.75  | 0.07               | 57.41  |

**Table S14.** The halogen bond lengths (top), angles (middle) and dihedral angles (bottom) in the complexes of iodine with the derivatives of **3**. The column label (e.g. on OH) denotes the site of halogen bonding on the acceptor. The lengths are in Ångströms and the angles are in degrees.

| Name            | azo tautomer |        |        | hydrazone tautomer |            |        |        |
|-----------------|--------------|--------|--------|--------------------|------------|--------|--------|
|                 | on OH        | on N1  | on N2  | on O               | on O conf2 | on N1  | on N2  |
| <b>3</b>        | 3.050        | 3.066  | 3.022  | 2.845              | 2.881      | 3.167  | 3.044  |
|                 | 174.75       | 174.05 | 174.71 | 179.44             | 179.84     | 173.11 | 175.50 |
|                 | 72.06        | 66.43  | 42.22  | 0.40               | 0.02       | 66.86  | 86.04  |
| 2-MeO- <b>3</b> | 3.057        | 2.984  | 2.946  | 2.793              | 2.851      | 3.189  | 3.124  |
|                 | 173.81       | 174.17 | 173.55 | 178.93             | 179.80     | 172.33 | 176.48 |
| 3-MeO- <b>3</b> | 73.60        | 71.47  | 32.34  | 0.24               | 0.02       | 70.53  | 82.70  |
|                 | 3.029        | 3.093  | 3.016  | 2.940              | 2.895      | 3.115  | 2.981  |

|          |        |        |        |        |        |        |        |
|----------|--------|--------|--------|--------|--------|--------|--------|
|          | 175.57 | 174.37 | 176.17 | 171.81 | 178.96 | 172.87 | 177.42 |
|          | 73.04  | 65.60  | 47.13  | 0.35   | 0.01   | 62.66  | 82.68  |
| 5-MeO-3  | 2.962  | 3.070  | 3.013  | 2.821  | 2.868  | 3.149  | 3.025  |
|          | 178.72 | 174.44 | 174.42 | 179.78 | 172.80 | 172.54 | 176.35 |
|          | 49.67  | 65.95  | 44.30  | 0.04   | 48.35  | 64.03  | 85.63  |
| 6-MeO-3  | 3.042  | 3.064  | 3.022  | 2.841  | 2.881  | 3.157  | 3.027  |
|          | 174.47 | 174.46 | 174.50 | 179.68 | 178.40 | 173.52 | 175.67 |
|          | 67.69  | 66.27  | 42.50  | 0.31   | 0.00   | 66.98  | 85.60  |
| 7-MeO-3  | 3.048  | 3.080  | 3.020  | 2.833  | 2.868  | 3.169  | 3.041  |
|          | 175.14 | 174.76 | 174.50 | 179.46 | 179.49 | 173.24 | 175.92 |
|          | 72.35  | 63.68  | 41.77  | 0.02   | 16.08  | 63.84  | 87.97  |
| 8-MeO-3  | 3.044  | 2.984  | 2.952  | 2.835  | 2.874  | 3.145  | 3.034  |
|          | 173.98 | 172.73 | 174.79 | 179.53 | 179.22 | 164.33 | 175.77 |
|          | 73.30  | 59.89  | 36.73  | 1.58   | 22.75  | 51.70  | 81.42  |
| 2'-MeO-3 | 3.043  | 3.026  | 3.031  | 2.834  | 2.871  | 3.159  | 3.041  |
|          | 174.78 | 174.10 | 169.70 | 179.47 | 179.91 | 173.53 | 176.89 |
|          | 72.32  | 64.49  | 52.85  | 0.27   | 0.03   | 67.45  | 74.14  |
| 3'-MeO-3 | 3.050  | 3.079  | 3.030  | 2.847  | 2.881  | 3.183  | 3.050  |
|          | 174.60 | 174.77 | 174.93 | 179.44 | 179.47 | 174.56 | 175.59 |
|          | 72.26  | 67.01  | 40.30  | 0.36   | 15.90  | 66.08  | 90.25  |
| 4'-MeO-3 | 3.042  | 3.056  | 3.016  | 2.834  | 2.872  | 3.161  | 3.015  |
|          | 174.49 | 174.48 | 174.68 | 179.44 | 179.93 | 173.61 | 176.15 |
|          | 72.52  | 68.18  | 39.01  | 0.27   | 0.08   | 65.66  | 88.79  |

**Table S15.** The halogen bond lengths (top), angles (middle) and dihedral angles (bottom) in the complexes of iodine with the derivatives of **4**. The column label (e.g. on OH) denotes the site of halogen bonding on the acceptor. The lengths are in Ångströms and the angles are in degrees.

| Name     | azo tautomer |        | hydrazone tautomer |        |
|----------|--------------|--------|--------------------|--------|
|          | on OH        | on N1  | on O               | on N1  |
| <b>4</b> | 2.968        | 3.164  | 2.835              | 3.193  |
|          | 179.34       | 173.63 | 178.25             | 173.41 |
|          | 37.87        | 64.22  | 0.08               | 68.04  |
| 3-MeO-4  | 3.102        | 3.165  | 2.932              | 3.195  |
|          | 162.31       | 173.12 | 168.52             | 172.86 |
|          | 0.02         | 64.22  | 0.19               | 68.14  |
| 4-MeO-4  | 2.964        | 3.155  | 2.801              | 3.183  |
|          | 178.81       | 174.75 | 178.99             | 174.53 |
|          | 37.33        | 64.28  | 0.04               | 68.36  |
| 5-MeO-4  | 2.96         | 3.16   | 2.82               | 3.20   |
|          | 179.39       | 173.07 | 178.07             | 171.26 |
|          | 35.41        | 64.19  | 0.07               | 68.07  |
| 6-MeO-4  | 2.958        | 3.161  | 2.830              | 3.183  |
|          | 179.46       | 174.15 | 178.46             | 174.68 |
|          | 37.53        | 64.27  | 0.01               | 68.10  |
| 7-MeO-4  | 2.963        | 3.171  | 2.826              | 3.198  |
|          | 179.35       | 174.75 | 178.16             | 174.21 |
|          | 37.30        | 62.32  | 0.09               | 65.57  |
| 8-MeO-4  | 2.954        | 3.131  | 2.826              | 3.28   |

|          |        |        |        |        |
|----------|--------|--------|--------|--------|
|          | 179.13 | 166.18 | 178.14 | 154.50 |
|          | 7.39   | 54.21  | 1.64   | 62.68  |
| 2'-MeO-4 | 2.917  | 3.127  | 2.796  | 3.184  |
|          | 178.05 | 174.25 | 177.77 | 173.98 |
|          | 27.86  | 64.28  | 0.11   | 68.43  |
| 3'-MeO-4 | 2.969  | 3.182  | 2.836  | 3.209  |
|          | 179.32 | 174.74 | 178.38 | 175.11 |
|          | 37.94  | 64.19  | 0.06   | 66.53  |
| 4'-MeO-4 | 2.956  | 3.151  | 2.816  | 3.182  |
|          | 179.10 | 174.13 | 177.98 | 173.54 |
|          | 42.89  | 65.56  | 0.04   | 67.72  |

**Fig. S2** shows how the bond lengths, angles, and dihedral angles are defined for the iodine–oxygen, iodine–iodine, and hydrogen bond interactions in the dimers of the derivatives **5**. The bond angle for the iodine-oxygen interaction refers to the C2'-I-O angle, and the bond angle for the iodine-iodine interaction refers to the C2'-I-I angle. The dihedral angles for the iodine-oxygen and iodine-iodine interactions are shown in blue and red, respectively. The bond angles for intramolecular hydrogen bonds refer to the O-H-N2 angle and the dihedral angle is defined by atoms C2, O, H and N2. In **Table S16**, the distances (top), angles (middle), and dihedral angles (bottom) are presented for all dimers of the AT-**5** and HT-**5** derivatives. For example, the atom distance for the iodine-oxygen interaction in the AT-**5** dimer is 3.129 Å, the angle is 178.14 degrees, and the dihedral angle is 36.13 degrees.

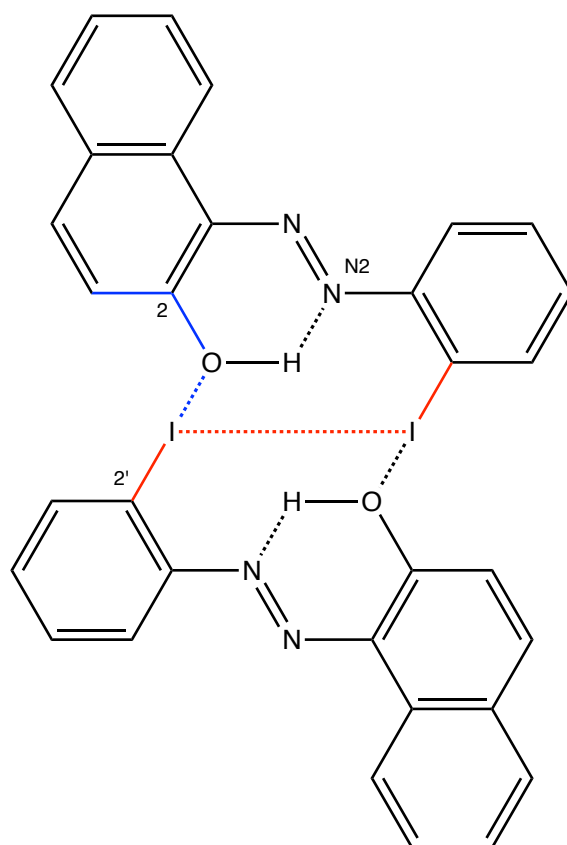

**Fig. S2** The iodine–oxygen, iodine–iodine, and the hydrogen bond interactions in the dimer of AT-5.

**Table S16.** Bond distances, angles and dihedral angles for the iodine-oxygen, iodine-iodine, and hydrogen bonding interactions in the dimers of the AT-5 and HT-5 derivatives. All distances are in Ångströms and the angles are in degrees.

| Name                 | azo tautomer dimer |        |        | hydrazone tautomer dimer |        |        |
|----------------------|--------------------|--------|--------|--------------------------|--------|--------|
|                      | I...O              | I...I  | OH...N | I...O                    | I...I  | NH...O |
| <b>5</b>             | 3.129              | 4.671  | 1.742  | 3.040                    | 4.735  | 1.801  |
|                      | 178.14             | 128.85 | 139.78 | 176.59                   | 128.46 | 130.88 |
|                      | 36.13              | 145.90 | 0.62   | 11.98                    | 164.14 | 1.03   |
| 3-MeO-5              | 3.247              | 5.163  | 1.755  | 3.111                    | 4.898  | 1.820  |
|                      | 166.91             | 121.24 | 139.05 | 172.87                   | 121.94 | 129.75 |
|                      | 30.09              | 129.11 | 3.23   | 26.96                    | 135.96 | 4.22   |
| 3-NO <sub>2</sub> -5 | 3.194              | 4.520  | 1.707  | 3.098                    | 4.569  | 1.809  |
|                      | 163.73             | 130.28 | 141.07 | 167.47                   | 128.93 | 130.08 |
|                      | 48.52              | 130.76 | 3.66   | 37.14                    | 143.82 | 0.85   |
| 4-MeO-5              | 3.134              | 4.719  | 1.712  | 3.027                    | 4.748  | 1.802  |
|                      | 179.53             | 128.43 | 141.01 | 177.83                   | 127.14 | 130.98 |
|                      | 35.32              | 146.87 | 0.40   | 18.48                    | 156.86 | 1.29   |
| 4-NO <sub>2</sub> -5 | 3.129              | 4.698  | 1.758  | 3.050                    | 4.717  | 1.796  |
|                      | 176.25             | 131.46 | 138.69 | 175.80                   | 129.54 | 131.03 |
|                      | 30.17              | 155.91 | 0.45   | 11.66                    | 168.04 | 0.42   |
| 5-MeO-5              | 3.127              | 4.672  | 1.739  | 3.034                    | 4.725  | 1.795  |

|                             |        |        |        |        |        |        |
|-----------------------------|--------|--------|--------|--------|--------|--------|
|                             | 178.02 | 128.88 | 139.91 | 176.57 | 128.37 | 131.07 |
|                             | 35.89  | 146.06 | 0.66   | 12.57  | 163.59 | 1.01   |
| 5-NO <sub>2</sub> -5        | 3.135  | 4.647  | 1.751  | 3.040  | 4.706  | 1.795  |
|                             | 177.54 | 128.86 | 139.16 | 176.53 | 128.32 | 131.16 |
|                             | 40.83  | 143.30 | 0.04   | 16.74  | 159.13 | 1.04   |
| 6-MeO-5                     | 3.123  | 4.667  | 1.753  | 3.041  | 4.721  | 1.802  |
|                             | 178.36 | 128.45 | 139.50 | 176.77 | 127.95 | 130.94 |
|                             | 37.87  | 144.36 | 0.85   | 16.55  | 158.92 | 1.24   |
| 6-NO <sub>2</sub> -5        | 3.141  | 4.643  | 1.744  | 3.041  | 4.688  | 1.796  |
|                             | 178.04 | 128.68 | 139.60 | 176.65 | 127.88 | 131.15 |
|                             | 38.74  | 142.91 | 0.83   | 19.30  | 155.84 | 1.63   |
| 7-MeO-5                     | 3.126  | 4.661  | 1.738  | 3.032  | 4.718  | 1.795  |
|                             | 178.10 | 128.63 | 140.06 | 176.77 | 128.00 | 131.04 |
|                             | 37.86  | 145.13 | 0.60   | 14.65  | 160.39 | 1.29   |
| 7-NO <sub>2</sub> -5        | 3.139  | 4.686  | 1.758  | 3.048  | 4.734  | 1.808  |
|                             | 178.42 | 128.99 | 139.19 | 176.57 | 128.55 | 130.81 |
|                             | 35.05  | 145.44 | 1.02   | 13.82  | 162.16 | 1.14   |
| 8-MeO-5                     | 3.130  | 4.631  | 1.677  | 3.044  | 4.743  | 1.788  |
|                             | 178.45 | 127.69 | 140.93 | 177.10 | 127.02 | 129.40 |
|                             | 29.56  | 144.81 | 5.14   | 14.18  | 160.84 | 1.06   |
| 8-NO <sub>2</sub> -5        | 3.130  | 4.631  | 1.677  | 3.044  | 4.743  | 1.788  |
|                             | 178.46 | 127.70 | 140.93 | 177.10 | 127.02 | 129.40 |
|                             | 29.61  | 144.81 | 5.17   | 14.20  | 160.84 | 1.06   |
| 3'-MeO-5                    | 3.125  | 4.797  | 1.75   | 3.045  | 4.827  | 1.807  |
|                             | 178.42 | 4.80   | 139.36 | 177.85 | 129.01 | 130.54 |
|                             | 20.51  | 130.89 | 0.43   | 0.01   | 179.99 | 0.00   |
| 3'-NO <sub>2</sub> -5       | 3.054  | 4.738  | 1.726  | 2.964  | 4.725  | 1.791  |
|                             | 176.30 | 132.94 | 140.19 | 176.69 | 129.74 | 130.97 |
|                             | 6.50   | 170.86 | 1.03   | 7.66   | 170.10 | 1.46   |
| 4'-MeO-5                    | 3.118  | 4.622  | 1.745  | 3.018  | 4.673  | 1.787  |
|                             | 178.64 | 127.19 | 139.92 | 177.10 | 126.60 | 131.45 |
|                             | 41.20  | 139.78 | 1.34   | 20.96  | 152.32 | 1.84   |
| 4'-NO <sub>2</sub> -5       | 3.111  | 4.664  | 1.728  | 3.026  | 4.732  | 1.805  |
|                             | 177.24 | 129.14 | 140.14 | 176.03 | 129.06 | 130.60 |
|                             | 35.33  | 147.99 | 0.60   | 0.02   | 179.97 | 0.01   |
| 5'-MeO-5                    | 3.133  | 4.696  | 1.744  | 3.049  | 4.751  | 1.803  |
|                             | 178.34 | 129.05 | 139.62 | 176.60 | 128.67 | 130.75 |
|                             | 32.86  | 148.48 | 0.65   | 8.64   | 169.08 | 0.63   |
| 5'-NO <sub>2</sub> -5       | 3.105  | 4.667  | 1.734  | 3.015  | 4.740  | 1.804  |
|                             | 178.52 | 127.66 | 140.08 | 176.97 | 127.48 | 130.40 |
|                             | 37.12  | 143.79 | 1.62   | 14.49  | 161.79 | 1.35   |
| 6'-MeO-5                    | 3.159  | 4.387  | 1.769  | 3.014  | 4.773  | 1.805  |
|                             | 173.72 | 127.30 | 139.67 | 179.20 | 123.66 | 131.08 |
|                             | 63.38  | 130.35 | 1.90   | 21.45  | 154.66 | 4.21   |
| 6'-NO <sub>2</sub> -5       | 3.130  | 4.442  | 1.753  | 3.001  | 4.760  | 1.812  |
|                             | 175.28 | 123.98 | 139.51 | 178.76 | 125.06 | 129.72 |
|                             | 62.70  | 127.66 | 4.17   | 2.25   | 154.16 | 3.03   |
| 4-MeO-4'-NO <sub>2</sub> -5 | 3.112  | 4.772  | 1.686  | 3.006  | 4.751  | 1.799  |
|                             | 176.82 | 131.81 | 141.82 | 176.81 | 128.63 | 130.93 |
|                             | 0.01   | 179.96 | 0.00   | 0.07   | 179.92 | 0.00   |
| 4-NO <sub>2</sub> -4'-MeO-5 | 3.112  | 4.703  | 1.757  | 3.027  | 4.695  | 1.777  |

|        |        |        |        |        |        |
|--------|--------|--------|--------|--------|--------|
| 176.18 | 131.73 | 138.94 | 175.92 | 129.23 | 131.87 |
| 25.05  | 159.04 | 0.510  | 13.66  | 166.61 | 0.29   |
